# Supplementary material for: Retrieval of aerosol properties from zenith sky radiance measurements
Source: Copernicus journal article supplement (doi:10.5194/amt-16-4423-2023), 2023-10-09
Supplement: Supplementary file 1 [file amt-16-4423-2023-supplement.pdf]

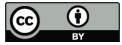

*Supplement of*

## **Retrieval of aerosol properties from zenith sky radiance measurements**

**Sara Herrero-Anta et al.**

*Correspondence to:* Sara Herrero-Anta (sara@goa.uva.es)

The copyright of individual parts of the supplement might differ from the article licence.

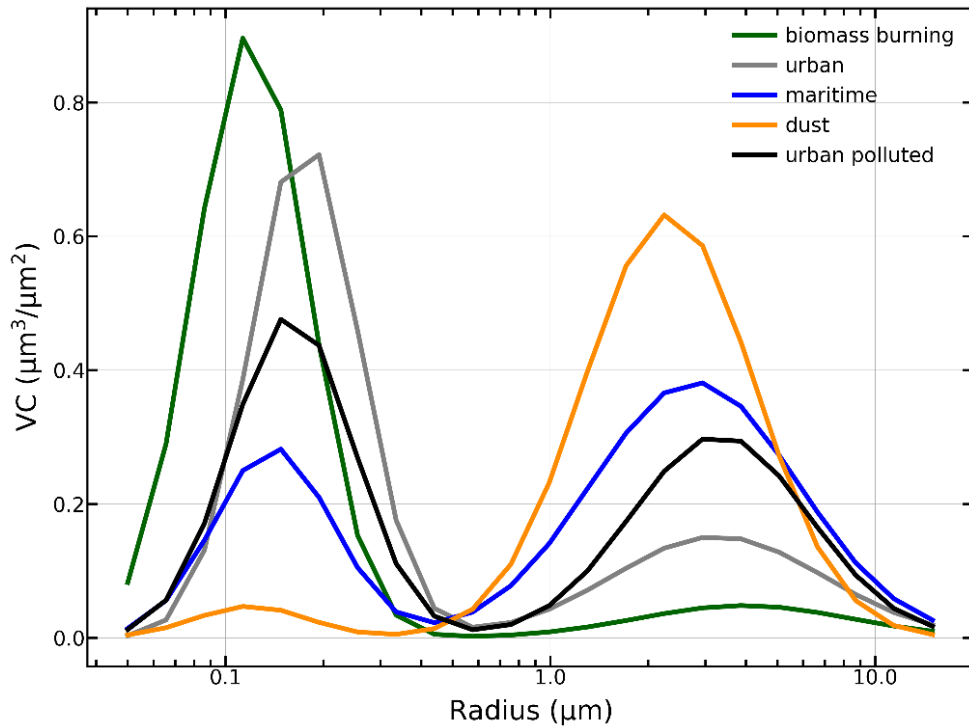

Figure S1. Aerosol size distribution for each aerosol type considered by the GRASP-ZEN inversion approach.

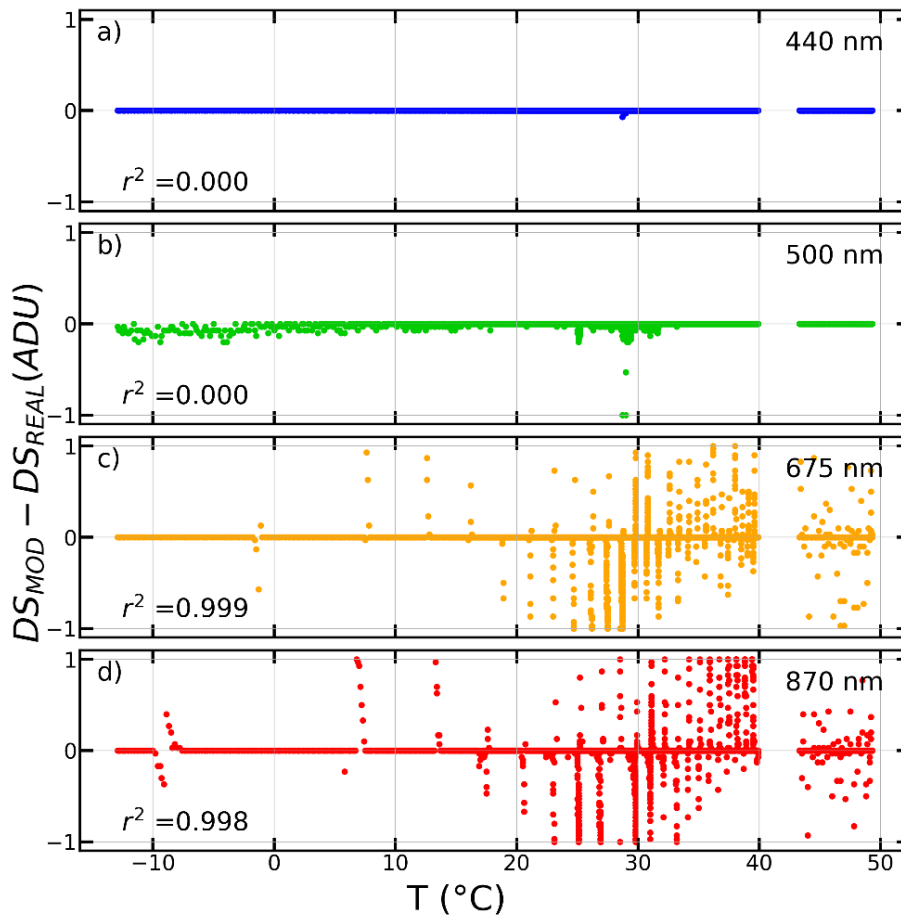

Figure S2. Residuals graph for the dark signal (DS) correction for the thermal chamber period. The differences between the modelled dark signal ( $DS_{MOD}$ ) and the correspondent real dark signal recorded by the ZEN-R52 ( $DS_{REAL}$ ) are plotted against the temperature at a) 440nm, b) 500nm, c) 675 nm and d) 870 nm. The determination coefficient ( $r^2$ ) obtained for the direct comparison of the  $DS_{MOD}$  against the  $DS_{REAL}$  is also included.

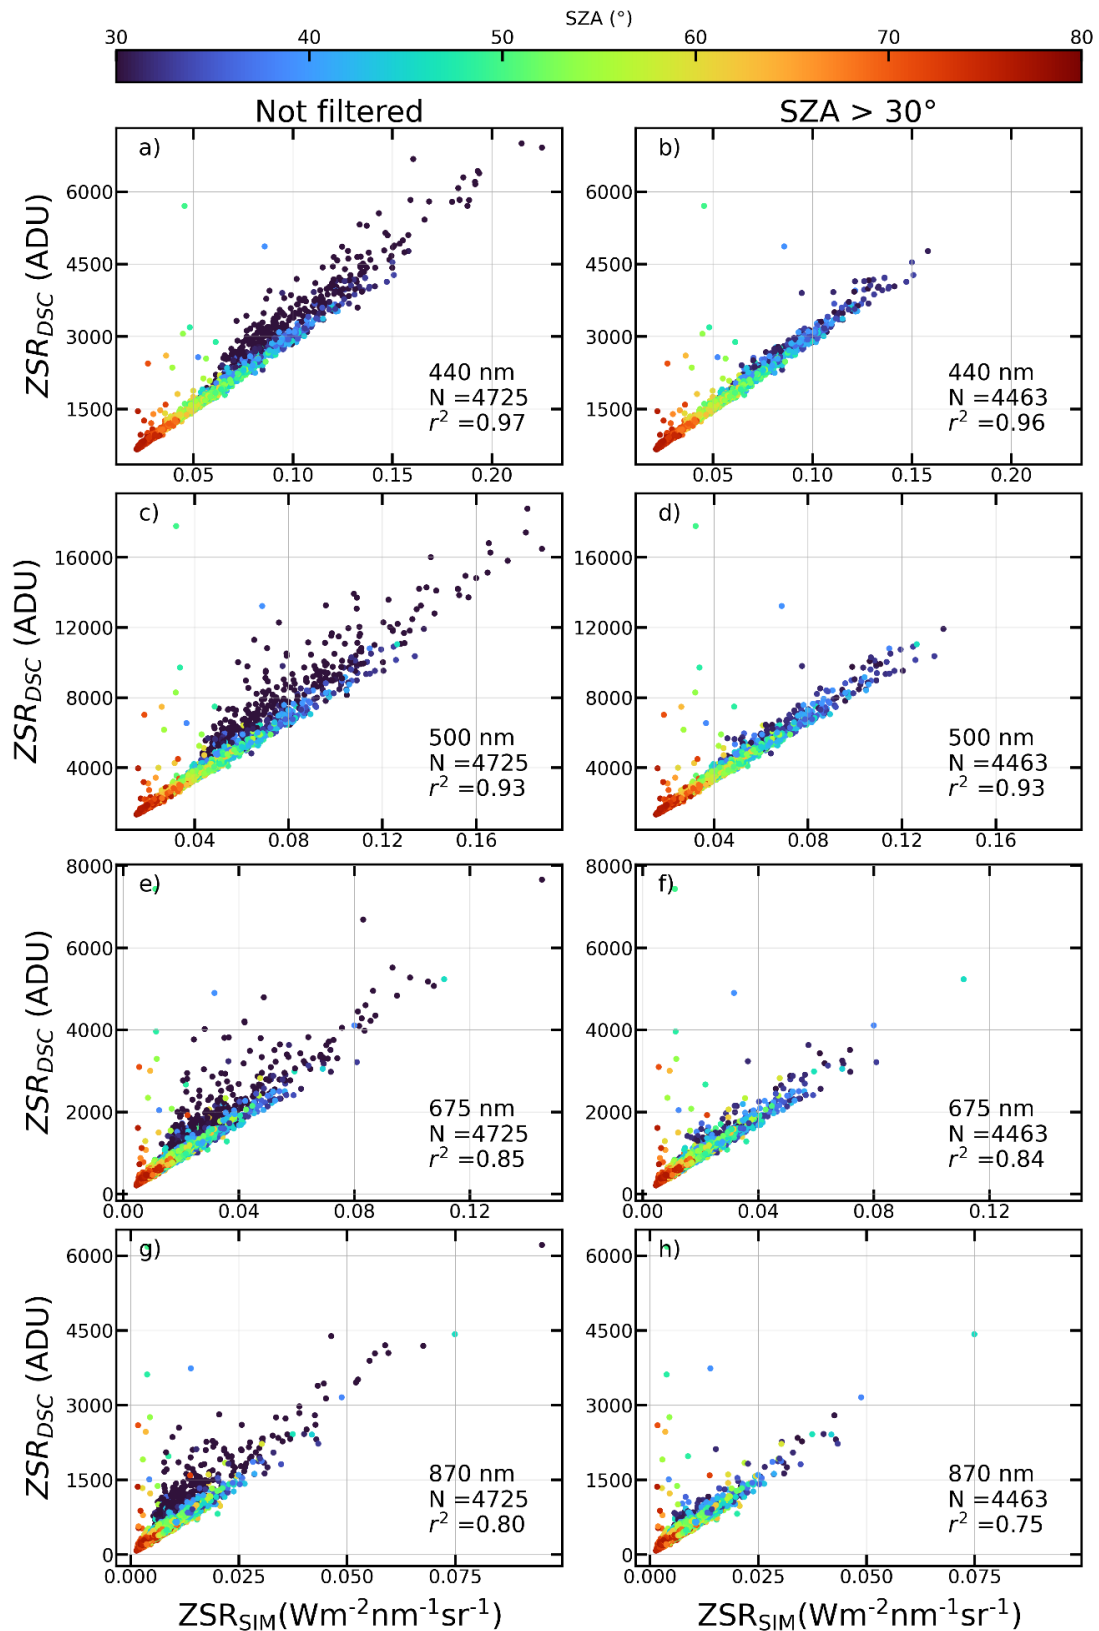

Figure S3. Scatter plot of the measured zenith sky radiances corrected from dark signal ( $ZSR_{DSC}$ ), in analogic-to-digital units (ADU), against the zenith sky radiances simulated by GRASP ( $ZSR_{SIM}$ ), both at 440 nm (upper panels), 500 nm (second row panels), 675 nm (third row panels) and 870 nm (bottom panels). Left and right panels show these data respectively before and after applying the SZA quality control filtering. Determination coefficient ( $r^2$ ) and number of data pairs (N) are also shown. Points colours represent the corresponding SZA.

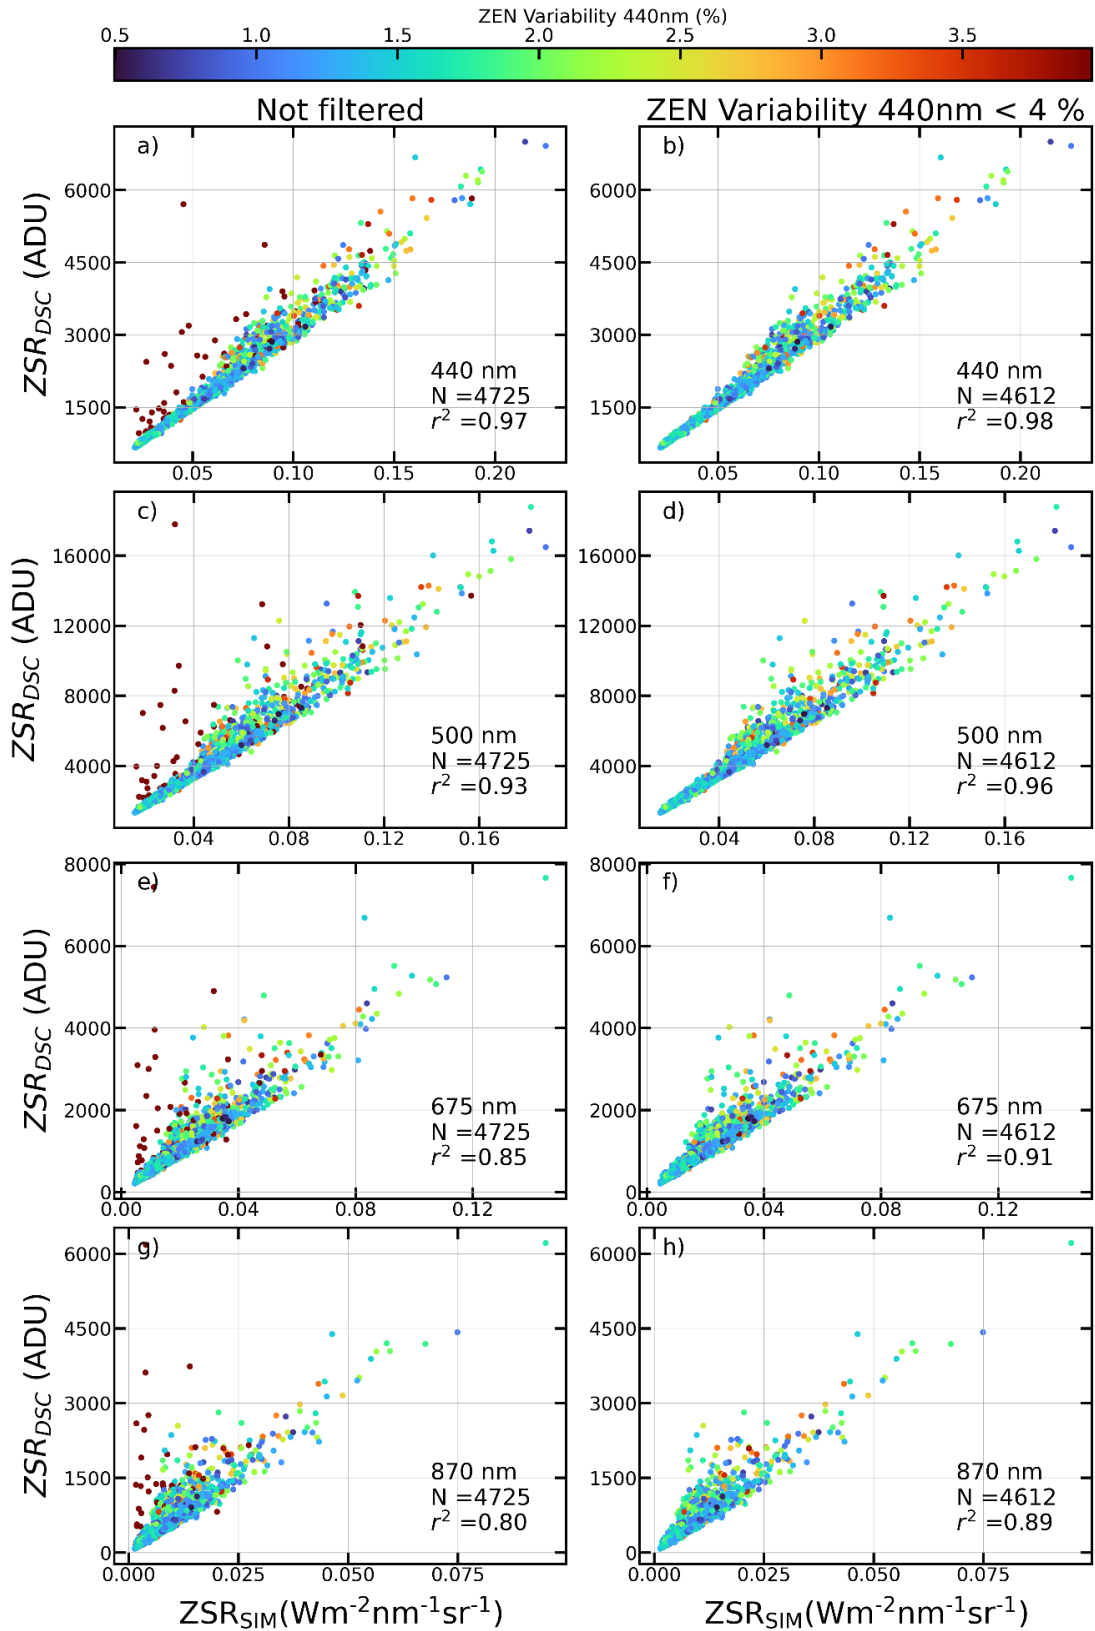

Figure S4. Scatter plot of the measured zenith sky radiances corrected from dark signal ( $ZSR_{DSC}$ ), in analogic-to-digital units (ADU), against the zenith sky radiances simulated by GRASP ( $ZSR_{SIM}$ ), both at 440 nm (upper panels), 500 nm (second row panels), 675 nm (third row panels) and 870 nm (bottom panels). Left and right panels show these data respectively before and after applying the ZEN variability quality control filtering. Determination coefficient ( $r^2$ ) and number of data pairs (N) are also shown. Points colours represent the corresponding ZEN variability.

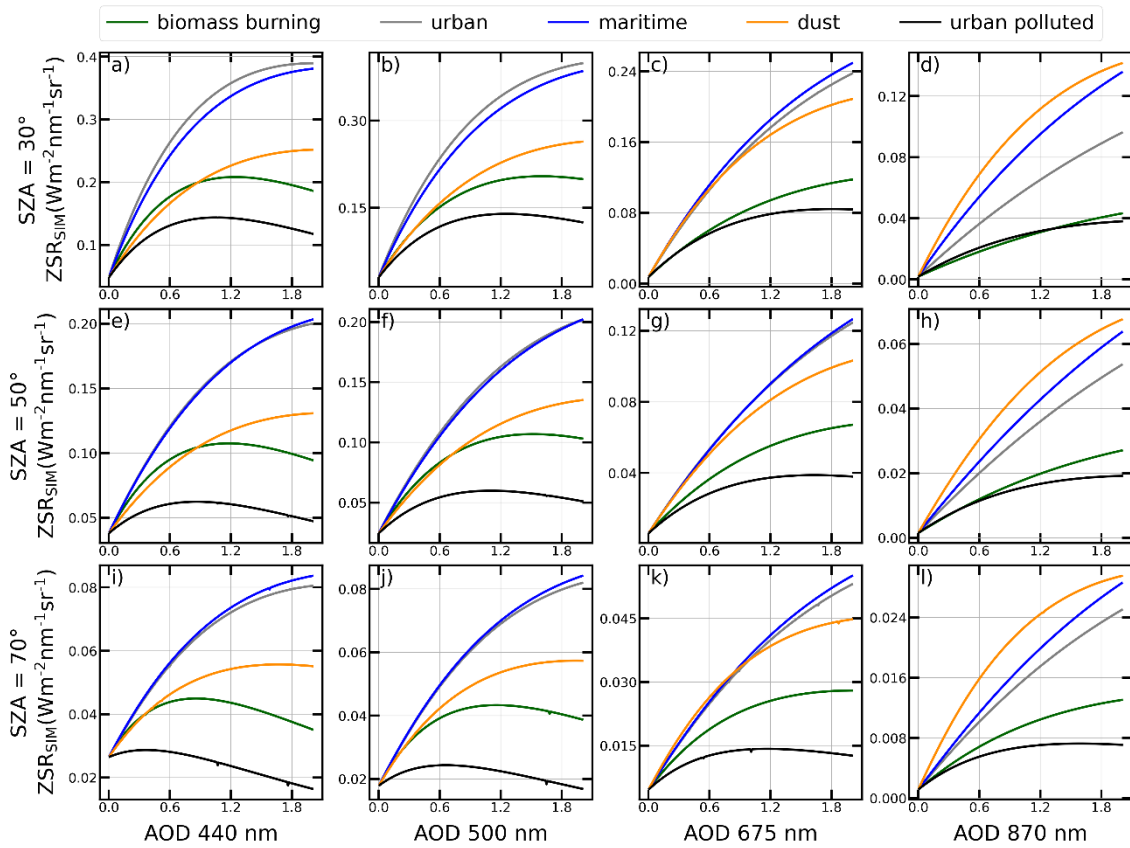

Figure S5. Zenith sky radiances (ZSR) modelled with GRASP for different aerosol concentrations at the four wavelength and for SZA = 30 (a-d), 50 (e-h) and 70° (i-l) for the different aerosol types from the ‘models’ method from GRASP.

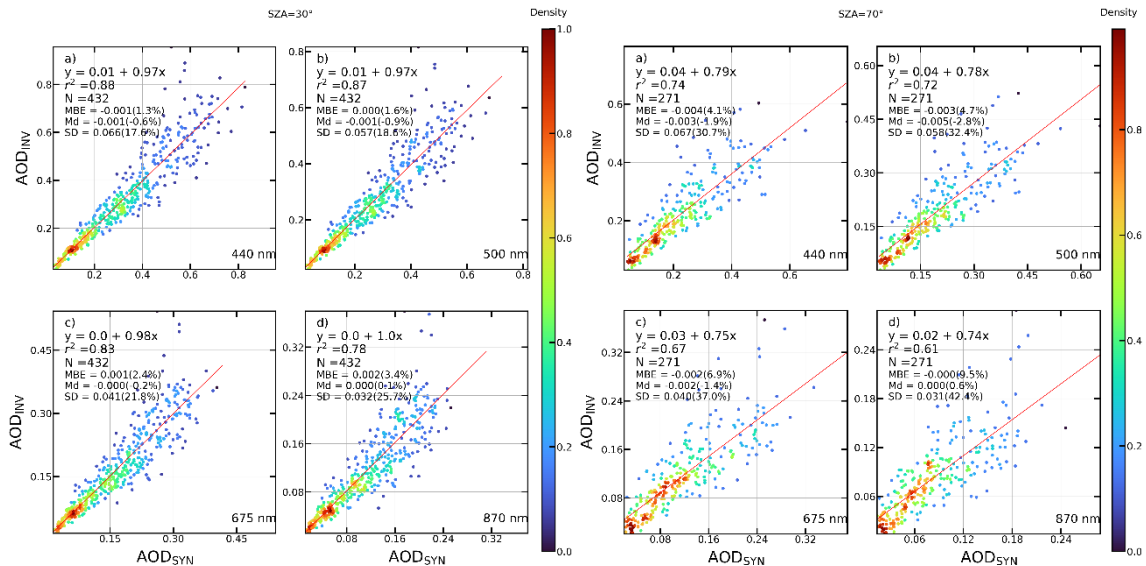

Figure S6. Left panel. Density scatter plot of the AOD retrieved by GRASP after the inversion of synthetic ZSR (AOD<sub>INV</sub>) against the initial AOD (AOD<sub>SYN</sub>) obtained for synthetic scenarios created from the combination of five aerosol types for SZA=30° at a) 440nm, b) 500nm, c) 675 nm and d) 870 nm. Linear fit (red line) with its equation, determination coefficient ( $r^2$ ) and number of data points (N) are shown. Mean bias error (MB), median (Md) and standard deviation (SD) of the absolute and  $\Delta$  (between brackets) differences between the inverted and synthetic AOD are also included. Right panel. Same plot for SZA=70°.

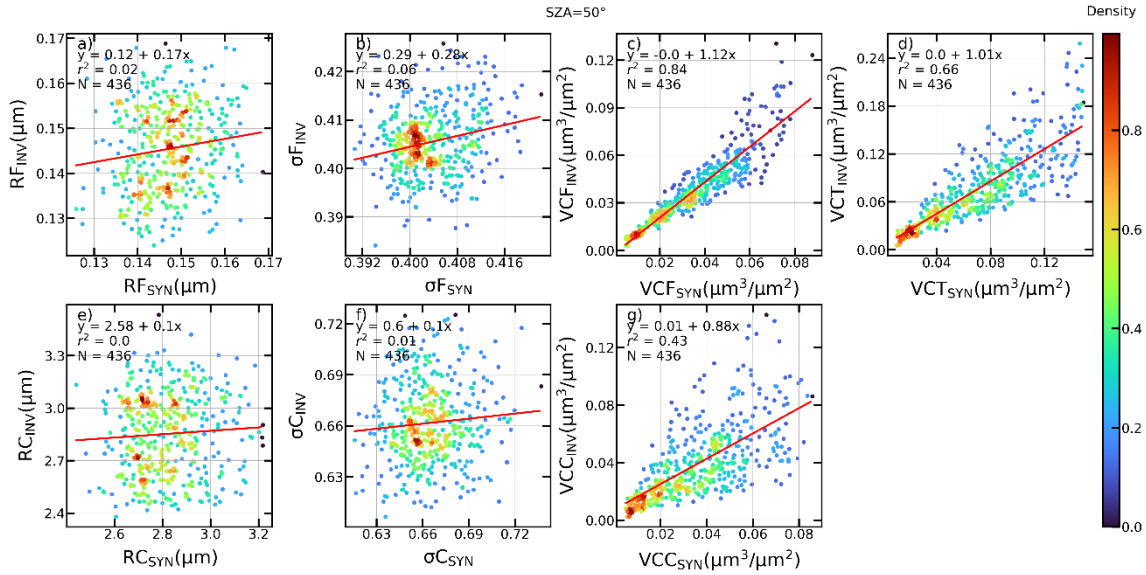

Figure S7. Density scatter plot of the aerosol size distribution properties retrieved by GRASP after the inversion of synthetic ZSR (INV) against the ones initially obtained (SYN) for synthetic scenarios created from the combination of five aerosol types for SZA=50°. Linear fit (red line) with its equation, determination coefficient ( $r^2$ ) and number of data points (N) are shown. These size distribution properties are volume median radius of fine (RF) and coarse (RC) modes, standard deviation of log-normal distribution for fine ( $\sigma F$ ) and coarse ( $\sigma C$ ) modes, and aerosol volume concentration for fine (VCF) and coarse (VCC) modes and the total (VCT).

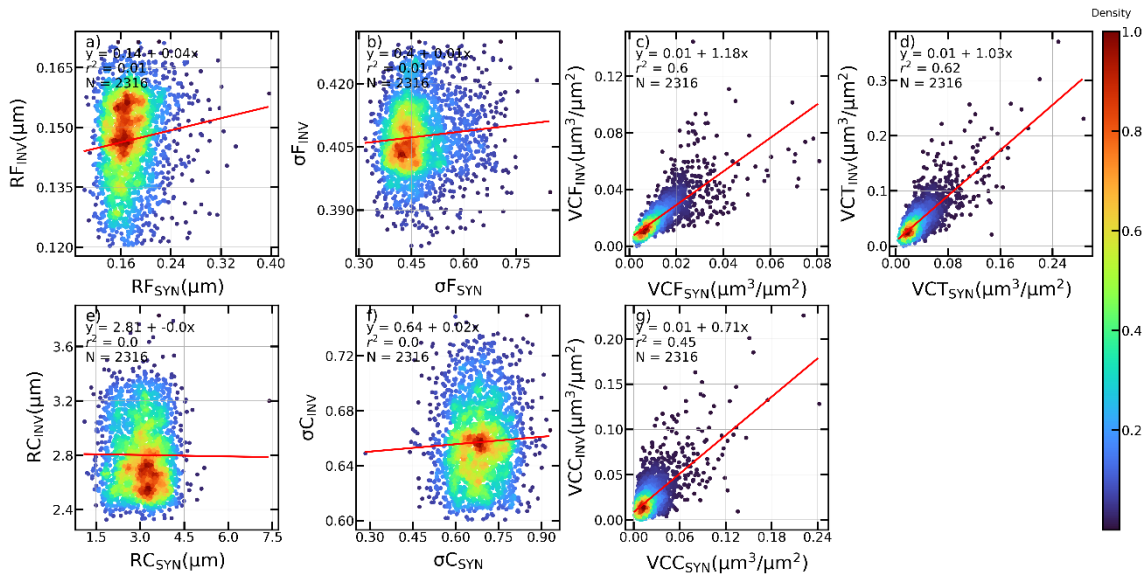

Figure S8. Density scatter plot of the aerosol size distribution properties retrieved by GRASP after the inversion of synthetic ZSR (INV) against the ones initially obtained (SYN) for synthetic scenarios obtained from AERONET retrievals. Linear fit (red line) with its equation, determination coefficient ( $r^2$ ) and number of data points (N) are shown. These size distribution properties are volume median radius of fine (RF) and coarse (RC) modes, standard deviation of log-normal distribution for fine ( $\sigma F$ ) and coarse ( $\sigma C$ ) modes, and aerosol volume concentration for fine (VCF) and coarse (VCC) modes and the total (VCT).
